# Supplementary material for: Metabolic pathways of potential miRNA biomarkers derived from liquid biopsy in epithelial ovarian cancer
Source: PubMed Central journal article supplement — Oncol Lett. 2023 Feb 23;25(4):142. doi: 10.3892/ol.2023.13728 (PMC9996378; doi:10.3892/ol.2023.13728), 2023-02-23
Supplement: Supplementary_Data.pdf [file Supplementary_Data.pdf]

Table SI. Primer sequences used in the present study.

| Gene                                  | Sequence (5'-3')                 |
|---------------------------------------|----------------------------------|
| lncRNA Lockd                          | F: AAGGTAGACTTGGGGAGGGC          |
|                                       | R: GAGATGCAGTCCGGTAGAGC          |
| Elovl5                                | F: GAACATTTTCGATGCGTCACTCA       |
|                                       | R: GGAGGAACCATCCTTTGACTCTT       |
| miR-582-5p (poly(A) tailing reaction) | F: ATACAGTTGTTCAACCAGTTAC        |
|                                       | R: TCTACTAGAGAGAGATTGCTAGTGGTGTT |
| $\beta$ -actin                        | F: AACAGTCCGCCTAGAAGCAC          |
|                                       | R: CGTTGACATCCGTAAAGACC          |
| U6                                    | F: CTCGCTTCGGCAGCACA             |
|                                       | R: AACGCTTCACGAATTTGCGT          |
| lncRNA Lockd (siRNA)                  | GCATCAAACATTCACGGAT              |

miR, miRNA; lncRNA, long non-coding RNA; F, forward; R, reverse; si, small interfering.
